# Supplementary material for: Integration of anatomy ontology data with protein–protein interaction networks improves the candidate gene prediction accuracy for anatomical entities
Source: PubMed Central journal article supplement (PMC7542696; doi:10.1186/s12859-020-03773-2), 2020-10-07
Supplement: 12859_2020_3773_MOESM3_ESM.pdf [file 12859_2020_3773_MOESM3_ESM.pdf]

### The definitions for the semantic similarity calculation methods

The semantic similarity equations for Resnik, Lin, and Schlicker methods are given below (equations 1, 2, and 3).

Resnik:

$$sim_R(t_1, t_2) = \max_{t \in S(t_1, t_2)} \{IC(t)\} \quad (1)$$

Lin:

$$sim_L(t_1, t_2) = \max_{t \in S(t_1, t_2)} \left\{ \frac{2IC(t)}{IC(t_1) + IC(t_2)} \right\} \quad (2)$$

Schlicker:

$$sim_S(t_1, t_2) = \max_{t \in S(t_1, t_2)} \left\{ \frac{2IC(t)}{IC(t_1) + IC(t_2)} (1 + IC(t)) \right\} \quad (3)$$

In the above equations,  $t_1$  and  $t_2$  represent the ontology terms between which the similarity is calculated, whereas  $S$  denotes the set of common ancestors for the two terms. The information content for a given term  $t$  is represented by  $IC(t)$ , which is calculated based on the number of genes annotated to the term  $t$  as illustrated below (equations 4 and 5).

$$IC(t) = -\log(p(t)) \quad (4)$$

$$P(t) = \frac{\text{Number of genes associated with the term } t}{\text{Total number of genes associated with the entire ontology}} \quad (5)$$

The Wang method does not use the IC. It only depends on the ontology structure and the relationships between the entities. The equation for the Wang semantic similarity calculation between the two entities  $t_1$  and  $t_2$  is given below.

Wang:

$$sim_W(t_1, t_2) = \frac{\sum_{t \in T_1 \cap T_2} (S_{t_1}(t) + S_{t_2}(t))}{SV(t_1) + SV(t_2)} \quad (6)$$

In the above equation,  $S_{t_i}(t)$  represents the semantic contribution of term ' $t$ ' on term  $t_i$ , when ' $t$ ' is an ancestor of  $t_i$ . The term  $SV(t_i)$  represents the semantic contribution of all the ancestors of term  $t_i$  on itself.
